# Supplementary material for: Modelling mutational landscapes of human cancers in vitro
Source: PubMed Central journal article supplement — Sci Rep. 2014 Mar 27;4:4482. doi: 10.1038/srep04482 (PMC5259794; doi:10.1038/srep04482), 2014-03-27
Supplement: srep04482-s1.pdf [file srep04482-s1.pdf]

## Supplementary Information

### TITLE

Modelling mutational landscapes of human cancers *in vitro*

### AUTHORS

Magali Olivier, Annette Weninger, Maude Ardin, Hana Huskova, Xavier Castells, Maxime P. Vallée, James McKay, Tatiana Nedelko, Karl-Rudolf Muehlbauer, Hiroyuki Marusawa, John Alexander, Lee Hazelwood, Graham Byrnes, Monica Hollstein and Jiri Zavadil

## Supplementary Figure 1

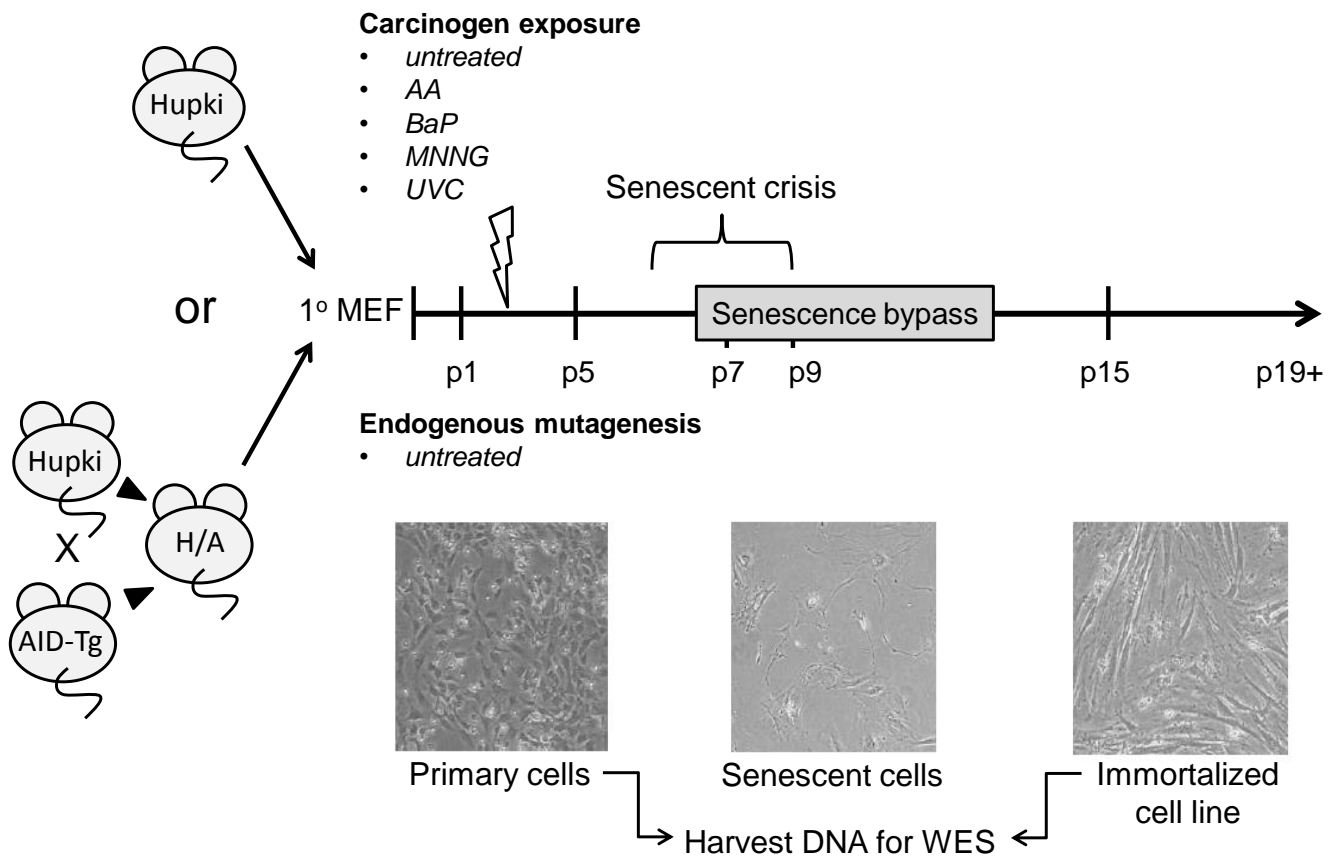

**Supplementary Figure 1.** Schematic overview of the modified 3T3 protocol for immortalisation of MEFs used to obtain cell lines for WES. Twenty-four or six cultures per embryo were used for experiments within each condition. p1 – p19+, arbitrarily selected cell culture passage numbers to facilitate orientation. The carcinogen exposure experiments included untreated controls and no substance treatment was applied in the assays for endogenous mutagenesis. Abbreviations used in the figure are as in the main text with the exception of H/A standing for the Hx AID-Tg cross.

## Supplementary Figure 2

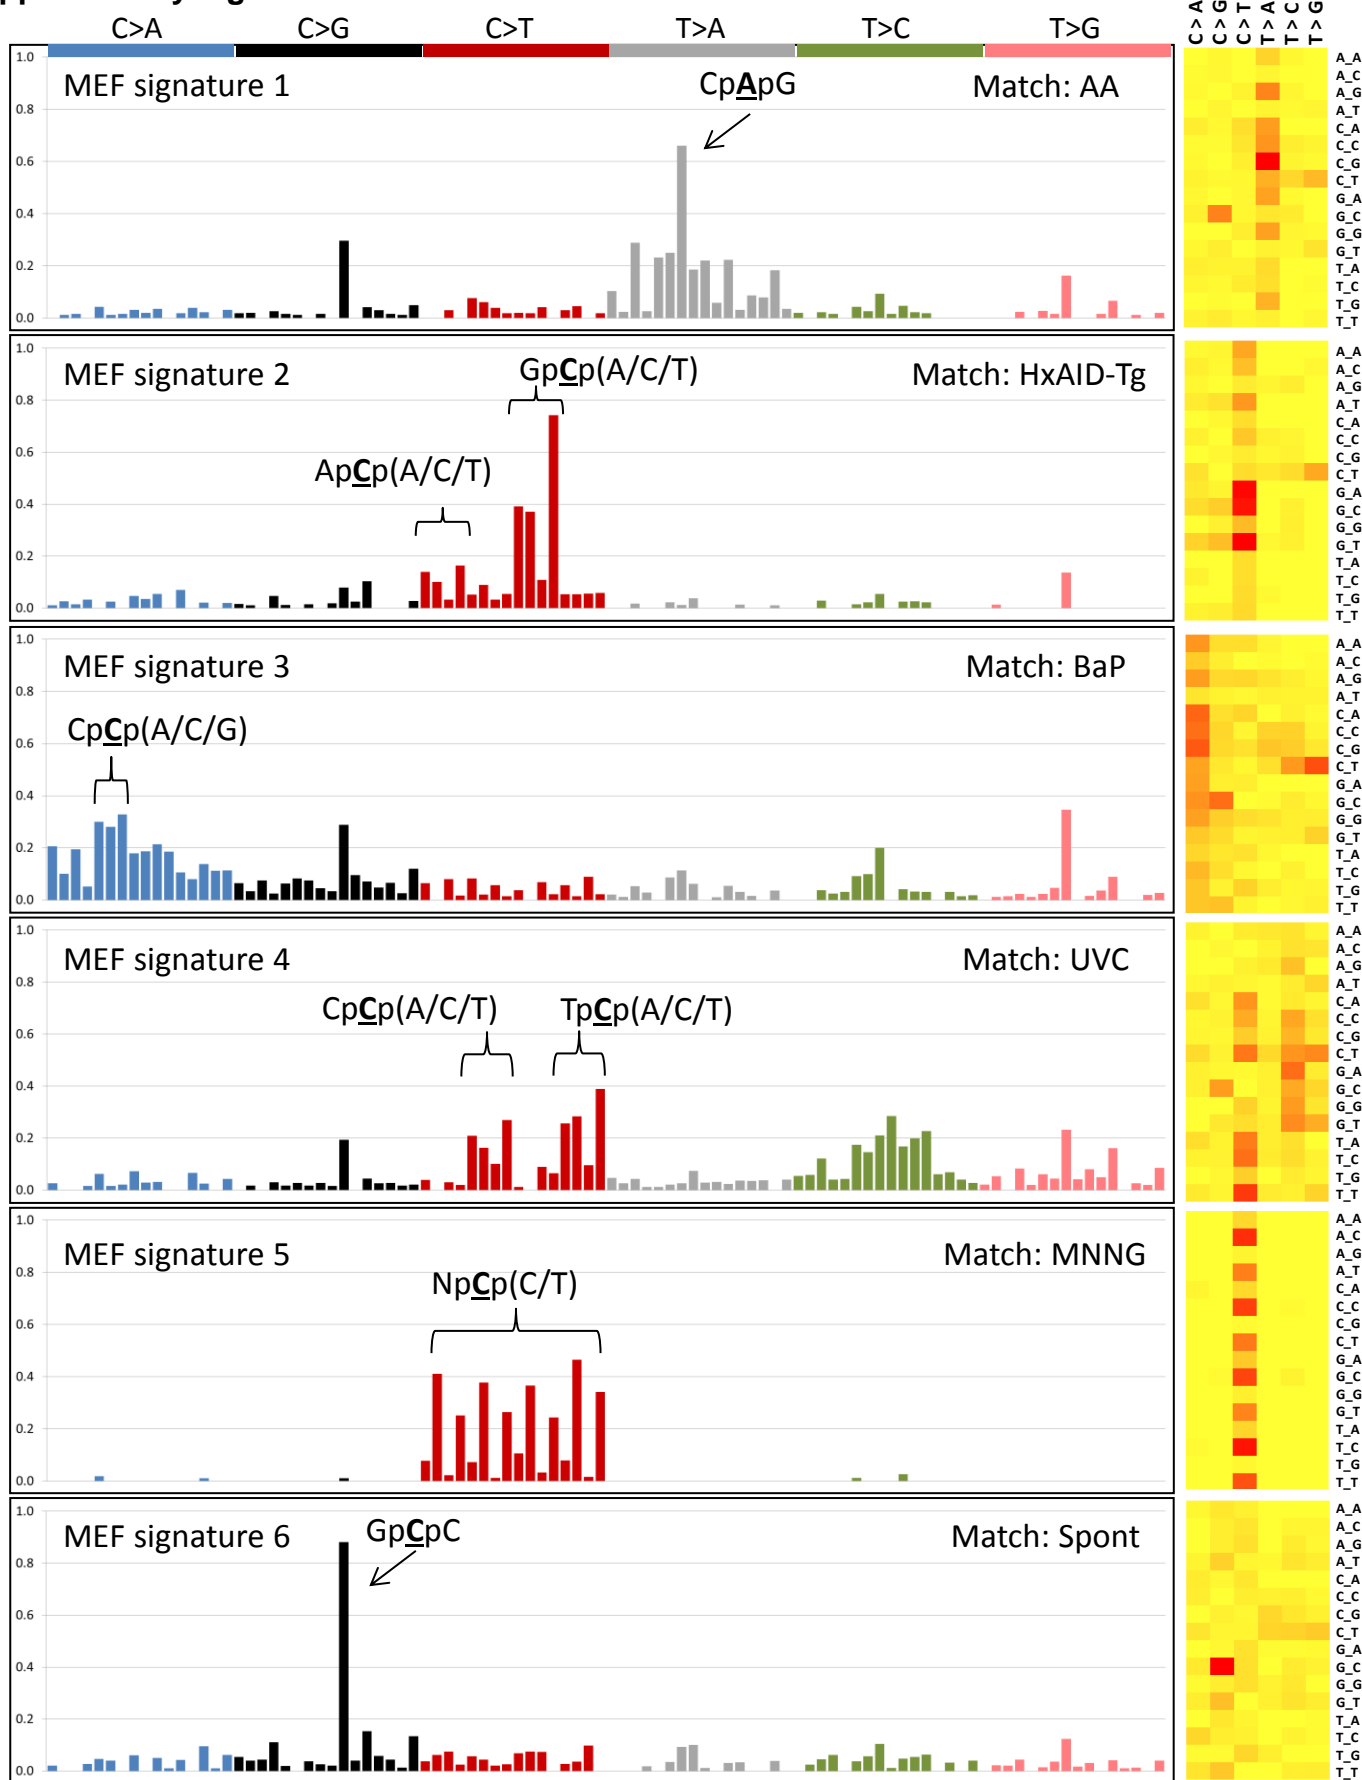

**Supplementary Figure 2:** Signatures identified by non-negative matrix factorisation in 14 MEF cell lines and their match with the 6 experimental conditions (MEFs treated with AA, BaP, MNNG, UVC, endogenous mutagenesis system HxAID-Tg and spontaneously immortalised cell lines). Y-axis: frequency distribution. The heatmap depiction of these signatures (right) allows a comparison with **Fig. 1** data.

## Supplementary Figure 3

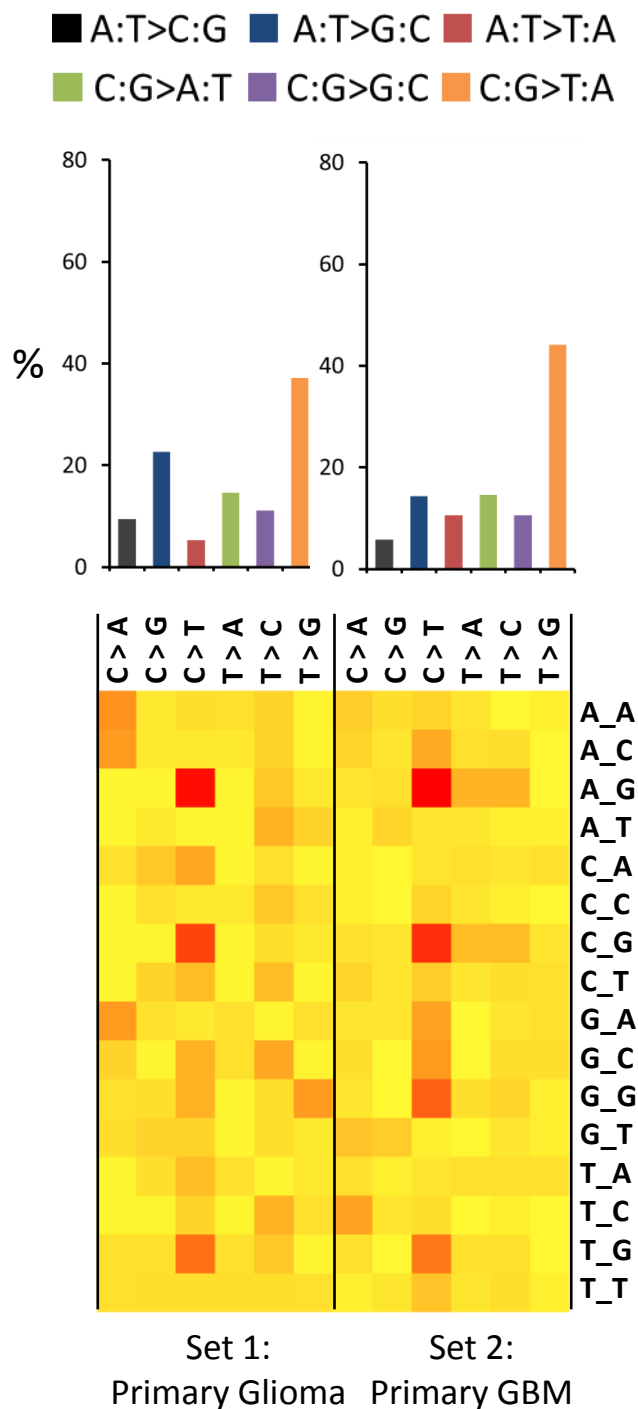

**Supplementary Figure 3.** Mutation patterns and single base substitution sequence context in primary gliomas from patients not exposed to temozolomide. Data were extracted from Set1: Johnson BE, et al. *Science*. 2014 Jan 10;343(6167):189-93. PubMed PMID: 24336570; Set2: Yost SE, et al. *PLoS One*. 2013;8(2):e56185. PubMed PMID: 23441165; PubMed Central PMCID: PMC3575368

**Supplementary Table 1: List of samples, treatment conditions and the *TP53* mutation status.**

| Cell line ID | Exposure type      | Exposure dose | Exposure duration | TP53 mutation                                              | Zygosity     | Reference                           |
|--------------|--------------------|---------------|-------------------|------------------------------------------------------------|--------------|-------------------------------------|
| AA_1         | AA                 | 50 uM         | 4 days            | c.745A>T (p.R249W)                                         | homozygous   | Nedelko et al., Int J Cancer (2009) |
| AA_2         | AA                 | 50 uM         | 4 days            | c.391A>T (p.N131Y); c.871A>T (p.K291*)                     | heterozygous | Nedelko et al., Int J Cancer (2009) |
| MNNG_1       | MNNG               | 20 uM         | 2 hrs             | c.296C>T (p.S99F)                                          | homozygous   | Nedelko et al., Int J Cancer (2009) |
| MNNG_2       | MNNG               | 20 uM         | 2 hrs             | c.734G>A (p.G245D)                                         | homozygous   | Nedelko et al., Int J Cancer (2009) |
| BaP_1        | BaP                | 1 uM          | 6 days            | c.845G>C (p.R282P)                                         | heterozygous | Reinbold et al., Oncogene (2008)    |
| BaP_2        | BaP                | 1 uM          | 6 days            | c.423C>G (p.C141W)                                         |              | Reinbold et al., Oncogene (2008)    |
| UVC_1        | UVC                | 20 J/m2       | n.a.              | c.743G>A (p.R248Q); c.747G>A (p.R249R); c.749C>A (p.P250H) | homozygous   | Liu et al., PNAS (2004)             |
| UVC_2        | UVC                | 20 J/m2       | n.a.              | c.535C>T (p.H179Y)                                         | homozygous   | Liu et al., PNAS (2004)             |
| HxAID-Tg_1   | none               | n.a.          | n.a.              | n.s.                                                       |              | unpublished                         |
| HxAID-Tg_2   | none               | n.a.          | n.a.              | n.s.                                                       |              | unpublished                         |
| Spont_1      | none               | n.a.          | n.a.              | n.s.                                                       |              | unpublished                         |
| Spont_2      | none               | n.a.          | n.a.              | n.s.                                                       |              | unpublished                         |
| Spont_3      | none               | n.a.          | n.a.              | c.314G>C (p.G105A)                                         | homozygous   | Whibley et al., J Biol Chem (2010)  |
| Spont_4      | none               | n.a.          | n.a.              | c.843C>G (p.D281E)                                         | homozygous   | Whibley et al., J Biol Chem (2010)  |
| Prim_1       | none (primary MEF) | n.a.          | n.a.              | none                                                       |              | unpublished                         |
| Prim_2       | none (primary MEF) | n.a.          | n.a.              | none                                                       |              | unpublished                         |

n.a. = not applicable

n.s. = not sequenced

## Supplementary Table 2: GO Biological Process of the C>G mutated genes in Spont cell lines

**a**

| GO ID      | GO Term                                                              | Gene Count | Fold Enrichment | % Enrichment | Fisher Exact p-value | Genes affected by non-synonymous C:G>G:C mutations                                      |
|------------|----------------------------------------------------------------------|------------|-----------------|--------------|----------------------|-----------------------------------------------------------------------------------------|
| GO:0042981 | regulation of apoptosis                                              | 11         | 1.94            | 2.08         | 0.0260               | <i>IRAK3, CASP9, TRP53BP2, ADAMTSL4, GSK3B, CX3CR1, MAEL, NR4A1, BIRC6, COL2A1, SRC</i> |
| GO:0043067 | regulation of programmed cell death                                  | 11         | 1.92            | 2.08         | 0.0290               | <i>IRAK3, CASP9, TRP53BP2, ADAMTSL4, GSK3B, CX3CR1, MAEL, NR4A1, BIRC6, COL2A1, SRC</i> |
| GO:0007155 | cell adhesion                                                        | 11         | 1.92            | 2.08         | 0.0290               | <i>HAPLN2, SVEP1, COL6A2, CDHR5, COL2A1, NLGN3, SCARB2, THBS1, SRC, EMILIN1, SCARF2</i> |
| GO:0010941 | regulation of cell death                                             | 11         | 1.91            | 2.08         | 0.0300               | <i>IRAK3, CASP9, TRP53BP2, ADAMTSL4, GSK3B, CX3CR1, MAEL, NR4A1, BIRC6, COL2A1, SRC</i> |
| GO:0007267 | cell-cell signaling                                                  | 10         | 3.37            | 1.89         | 0.0008               | <i>FGFR4, RAPSN, P2RX3, P2RX2, GRIK5, SLC22A3, NLGN3, CACNA1C, SNAP25, FGF3</i>         |
| GO:0007268 | synaptic transmission                                                | 8          | 4.39            | 1.52         | 0.0005               | <i>RAPSN, P2RX3, P2RX2, GRIK5, SLC22A3, NLGN3, CACNA1C, SNAP25</i>                      |
| GO:0019725 | cellular homeostasis                                                 | 8          | 2.28            | 1.52         | 0.0250               | <i>CCR10, PTH1R, GRIK5, CACNA1G, GNPAT, NLGN3, CACNA1C, QSOX1</i>                       |
| GO:0043062 | extracellular structure organization                                 | 7          | 4.59            | 1.33         | 0.0009               | <i>ADAMTSL4, P2RX2, MYH11, GNPAT, COL2A1, NLGN3, EMILIN1</i>                            |
| GO:0000122 | negative regulation of transcription from RNA polymerase II promoter | 6          | 2.54            | 1.14         | 0.0310               | <i>SATB2, MAEL, SOX6, ZFPM1, TCF25, KDM6B</i>                                           |
| GO:0032940 | secretion by cell                                                    | 5          | 2.63            | 0.95         | 0.0420               | <i>EXOC7, CACNA1C, SYTL1, SNAP25, STXBPSL</i>                                           |

**b**

| Refgene Symbol | Chr   | Start     | Ref | Alt | mRNA_refSeqID | nt_change | AA_change | Mapping | SBS mutation type | cytoBand | Genome Strand | Cell line |
|----------------|-------|-----------|-----|-----|---------------|-----------|-----------|---------|-------------------|----------|---------------|-----------|
| Adamtsl4       | chr3  | 95487668  | C   | G   | NM_144899     | c.G911C   | p.G304A   | exonic  | nonsynonymous     | 3qF2.1   | -             | Spont_2   |
| Birc6          | chr17 | 74965213  | G   | C   | NM_007566     | c.G1126C  | p.A376P   | exonic  | nonsynonymous     | 17qE2    | +             | Spont_4   |
| Casp9          | chr4  | 141368196 | G   | C   | NM_015733     | c.G1237C  | p.A413P   | exonic  | nonsynonymous     | 4qE1     | +             | Spont_2   |
| Col2a1         | chr15 | 97808836  | G   | C   | NM_001113515  | c.C3326G  | p.S1109C  | exonic  | nonsynonymous     | 15qF1    | -             | Spont_4   |
| Cx3cr1         | chr9  | 119960659 | C   | G   | NM_009987     | c.G794C   | p.S265T   | exonic  | nonsynonymous     | 9qF4     | -             | Spont_4   |
| Gsk3b          | chr16 | 38194009  | G   | C   | NM_019827     | c.G742C   | p.A248P   | exonic  | nonsynonymous     | 16qB3    | +             | Spont_3   |
| Irak3          | chr10 | 119602212 | G   | C   | NM_028679     | c.C863G   | p.A288G   | exonic  | nonsynonymous     | 10qD2    | -             | Spont_1   |
| Mael           | chr1  | 168131788 | C   | G   | NM_175296     | c.G1196C  | p.S399T   | exonic  | nonsynonymous     | 1qH2.3   | -             | Spont_4   |
| Nr4a1          | chr15 | 101101224 | G   | C   | NM_010444     | c.G709C   | p.A237P   | exonic  | nonsynonymous     | 15qF2    | +             | Spont_3   |
| Src            | chr2  | 157294960 | G   | C   | NM_001025395  | c.G1213C  | p.A405P   | exonic  | nonsynonymous     | 2qH1     | +             | Spont_2   |
| Trp53bp2       | chr1  | 184378624 | G   | C   | NM_173378     | c.G2038C  | p.E680Q   | exonic  | nonsynonymous     | 1qH5     | +             | Spont_2   |

**Supplementary Table 2: (a)** Gene Ontology analysis of the genes affected by non-synonymous C:G>G:C mutations in the spontaneously immortalised cell lines, using the NIH DAVID GO tool.

**(b)** List of mutated genes and their acquired alterations that map to the highest enriched categories of regulation of apoptosis (GO:0042981) and regulation of programmed cell death (GO:0043067).

**Supplementary Table 3: Summary metrics of WES data.**

| Sample     | Total Number of Reads* | % Mapped reads, both in pair* | % Duplicates reads** | % Reads with quality > 20*** | Mapped reads on target* | % Mapped reads on target* | % GC * | Mean Coverage* | % covered 1X* | % covered 14X* | % covered 30X* | Total number SBSs# | Pearson coefficient## |
|------------|------------------------|-------------------------------|----------------------|------------------------------|-------------------------|---------------------------|--------|----------------|---------------|----------------|----------------|--------------------|-----------------------|
| AA_1       | 55,116,881             | 95.78                         | 26.83                | 90.58                        | 44,082,924              | 79.98                     | 54.81  | 71.86          | 99.026        | 83.290         | 63.215         | 644                | 0.6664                |
| AA_2       | 33,201,370             | 99.34                         | 5.36                 | 95.32                        | 26,500,867              | 79.82                     | 51.38  | 42.33          | 99.667        | 85.970         | 56.826         | 588                | 0.6954                |
| BaP_1      | 77,269,160             | 98.73                         | 6.92                 | 88.23                        | 47,454,568              | 61.41                     | 51.89  | 76.27          | 99.809        | 94.269         | 79.087         | 1206               | 0.535                 |
| BaP_2      | 48,600,495             | 99.34                         | 6.08                 | 81.64                        | 37,907,317              | 78                        | 51.4   | 60.52          | 99.720        | 91.264         | 70.903         | 671                | 0.4393                |
| HxAID-Tg_1 | 49,447,050             | 98.54                         | 7.63                 | 97.21                        | 38,069,266              | 76.99                     | 49.5   | 62.39          | 99.742        | 89.523         | 65.681         | 293                | 0.5853                |
| HxAID-Tg_2 | 48,452,293             | 98.57                         | 5.87                 | 97.39                        | 37,663,039              | 77.73                     | 49.51  | 62.11          | 99.734        | 88.697         | 64.152         | 550                | 0.6105                |
| MNNG_1     | 54,535,240             | 96.69                         | 30.69                | 79.51                        | 45,342,126              | 83.14                     | 54.36  | 73.63          | 99.030        | 85.196         | 66.084         | 1196               | 0.5438                |
| MNNG_2     | 54,527,486             | 97.29                         | 32.54                | 80.69                        | 41,517,397              | 76.14                     | 53.94  | 67.09          | 98.941        | 84.058         | 63.509         | 1087               | 0.5926                |
| Spont_1    | 54,140,927             | 98.33                         | 7.04                 | 97.41                        | 42,311,420              | 78.15                     | 49.54  | 69.59          | 99.651        | 91.558         | 70.805         | 207                | 0.4396                |
| Spont_2    | 53,784,459             | 98.42                         | 6.33                 | 97.25                        | 41,715,179              | 77.56                     | 49.08  | 68.72          | 99.631        | 90.406         | 68.229         | 291                | 0.4841                |
| Spont_3    | 50,771,299             | 97.25                         | 31.36                | 84.95                        | 42,049,679              | 82.82                     | 54.32  | 68.01          | 99.126        | 83.987         | 63.773         | 109                | 0.53                  |
| Spont_4    | 55,843,452             | 99.32                         | 5.55                 | 78.28                        | 44,513,764              | 79.71                     | 52     | 71.44          | 99.775        | 93.123         | 76.303         | 321                | 0.3561                |
| UVC_1      | 9,481,442              | 97.72                         | 5.73                 | 96.32                        | 5,239,673               | 55.26                     | 50.83  | 8.3            | 95.924        | 16.626         | 1.888          | 346                | 0.5069                |
| UVC_2      | 38,085,395             | 99.48                         | 6.39                 | 86.97                        | 30,255,889              | 79.44                     | 51.03  | 48.03          | 99.623        | 87.900         | 62.282         | 937                | 0.5232                |
| Prim_1     | 55,188,132             | 98.18                         | 5.88                 | 98.18                        | 41,878,241              | 75.88                     | 49.66  | 68.54          | 99.72         | 92.21          | 71.64          | NA                 | NA                    |
| Prim_2     | 46,200,087             | 97.15                         | 30.58                | 88.2                         | 38,651,510              | 83.66                     | 54.22  | 62.66          | 99.10         | 83.22          | 62.03          | NA                 | NA                    |

\* Metrics obtained with QualiMap using BAM files

\*\* Metrics obtained with BamUtil from duplicates marked by Picard in BAM file

\*\*\* Metrics obtained with BamUtil using BAM files

# Total number of SNV considered after variant calling by MuTect and filtering as described in Methods

## Pearson correlation coefficient between the number of SNV per chromosome and chromosome size, calculated with R

## Supplementary Datasets Captions

**Supplementary Dataset 1 (xls file):** List of all annotated single base substitutions found in oncogenes, tumour suppressor genes and regulators of the epigenome.

**Supplementary Dataset 2 (xls file):** Summary of non-synonymous and truncating single base substitutions found in oncogenes, tumour suppressor genes and regulators of the epigenome. Conditions (exposures or AID transgenic status) and corresponding cell lines are shown in column headings (abbreviations are used as in main text). The numbers of mutations in each cell line are shown for individual genes and the fields are colour-coded to indicate condition-specific predominant alteration (yellow) and non-specific alteration (blue), or presence of both (yellow/blue in diagonally split fields). Asterisk denotes that a gene is listed in at least two functional categories.

**Supplementary Dataset 3 (xls file):** Lists of all annotated single base substitutions identified in MEF cell lines and in used human datasets.
